# Supplementary material for: Responses of the marine diatom Thalassiosira pseudonana to changes in CO2 concentration: a proteomic approach
Source: PubMed Central journal article supplement (PMC5299434; doi:10.1038/srep42333), 2017-02-09
Supplement: srep42333-s1.pdf [file srep42333-s1.pdf]

Supplemental Data from the original manuscript by Clement *et al.* entitled

**Responses of the marine diatom *Thalassiosira pseudonana* to changes in CO<sub>2</sub> concentration: a proteomic approach**

Romain Clement<sup>1</sup>, Sabrina Lignon<sup>2</sup>, Pascal Mansuelle<sup>2</sup>, Erik Jensen<sup>1</sup>, Mathieu Pophillat<sup>3</sup>, Regine Lebrun<sup>2</sup>, Yann Denis<sup>4</sup>, Carine Puppo<sup>1</sup>, Stephen C. Maberly<sup>5</sup> & Brigitte Gontero<sup>1,\*</sup>

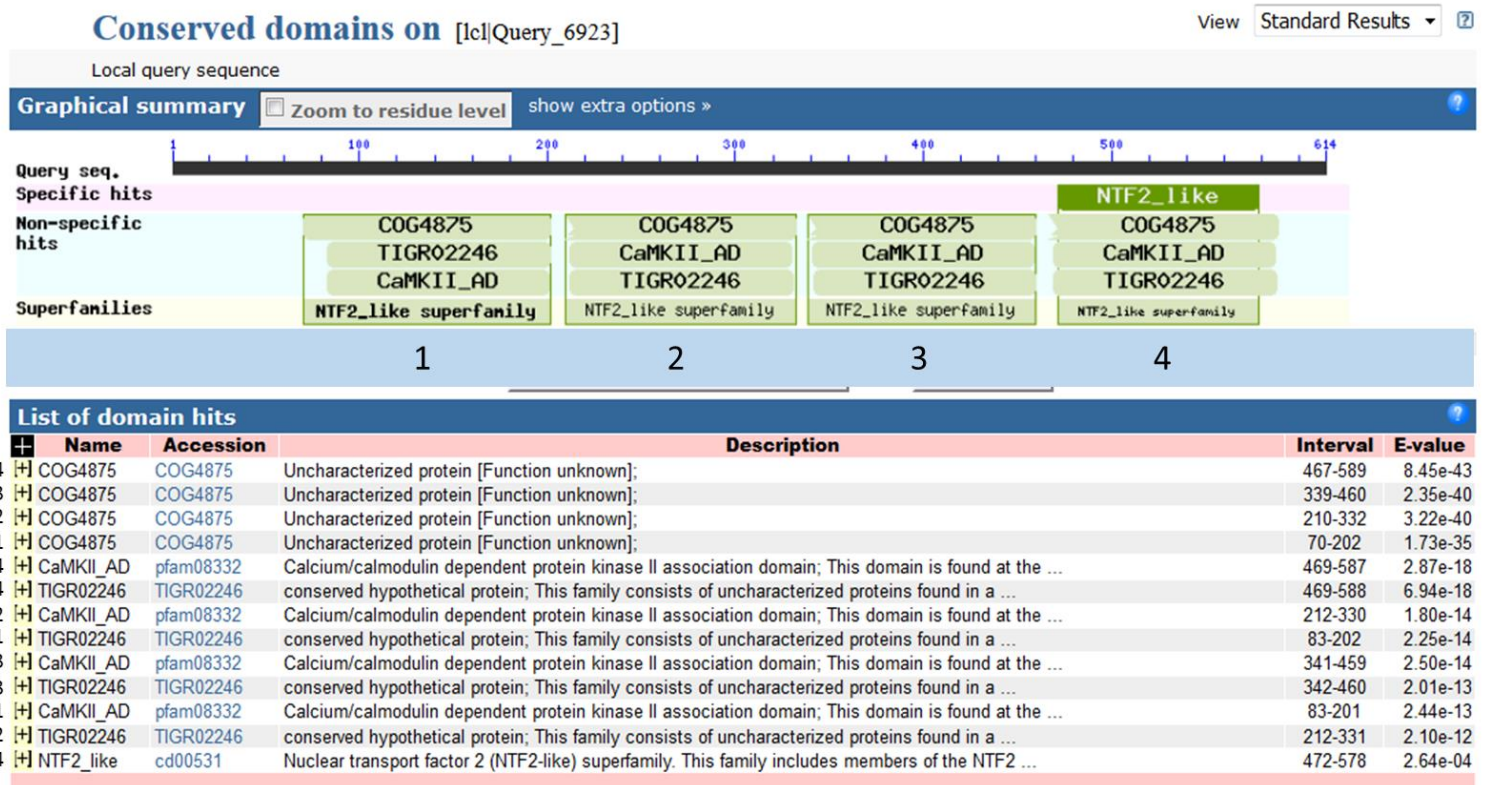

**Figure S1. Conserved domains within LCIP63 sequence from *T. pseudonana*.** Domains present in the LCIP 63 were identified using BLAST. LCIP63 contains four domains. On the left side of the list are mentioned numbers (1,2,3 and 4) that correspond to each domain. The E values allow to discriminate between the different possible domains (COG4875, Calcium/calmodulin dependent protein kinase II association domain, the lower E-value, corresponding to the most significant score and alignment).

```
>tr|B7G7G0|B7G7G0_PHATC Predicted protein OS=Phaeodactylum tricornutum
(strain CCAP 1055/1) GN=PHATRDRAFT_39236 PE=4 SV=1
MKIGYLANVLVAISLSSASGFELRRFSATSTFPGGQLTYVTPFTKVVKQKDTTQLRMGIR
SFIRGKKLTVNHSNDNKNLTGPTKNEAEIRALFSLWNNALATGDSRLVAARYASDAVLLP
TVSDIPRTNYDLIKNYFDAFLKPKQGVKEGYIKLGKGWAQDNGIYEFTMGIDNTKVKA
RYSFVYTKENGKWKIAHHHSSMMPEGITVGRPIEEEEVKNLFLHWNDALATGDSRVVADR
YAKTSVLLPTVSDVPRTDYDGIDYFDAFLKPKQGVILESNVVIKANWAQDAGLYEFTM
GVDGSKVQARYTFVYVFEEDGQWKISHHHSSVMPEAFLGPAAPANANTEVVSKK
```

CLUSTAL O(1.2.1) multiple sequence alignment

```
LCIP63          MKFTSSSLVFLSAVSTVSSFAPNTVHTT--RIG---TSATSFNDHIIADTRTSTEL
tr|B7G7G0      MKIG--YLANVLVAISLSSASGFELRRFSATSTFPGGQLTYVTPFTKVVK-QKDTTQLRM
**:      *: ** . :*:*. * . . :*      * * * . * * . : . * . . :

LCIP63          GLFGSRWRQARKFN--APAKTIGKGSSITEEEVRSFLTLWNSALATGDSRIVASRYTKN
tr|B7G7G0      GIR--SFIRGKKLTVNHSNDNKNLTGPTKNEAEIRALFSLWNNALATGDSRLVAARYASD
*:      : :*:*. : :. . * : . * *:*:*:*:*:*:*:*:*:*:*:*:*:*:*:*:.

LCIP63          PVLLPTVSDQARTDYDSVKDYFDAFLKPKQVKIIEGKINIGDSWASDCGIYEFTLGATG
tr|B7G7G0      AVLLPTVSDIPRTNYDLIKNYFDAFLKPKQGVKEGYIKLGKGWAQDNGIYEFTMGIDN
*****  **:* * :*:***** * * * * :*:*. * * *****:*

LCIP63          EKVKARYSFNYVQENGVWVKIQHHHSSVMPEEIAMGKAITEDEVRLFSLWNNALATLDPK
tr|B7G7G0      TKVKARYSFVYTKENGKWKIAHHHSSMMPEGITVGRPIEEEEVKNLFLHWNDALATGDSR
*****  *:* * * * * * * * * * * * * * * * * * * * * * * * * * * :

LCIP63          QVAARYAKKGVLLPTVSDKARTDFSSIEDYFVNFLKPKRGRTILESHVTVGKNWCQDAGI
tr|B7G7G0      VVADRYAKTSVLLPTVSDVPRTDYDGIDYFDAFLKPKQGVILESNVVIKANWAQDAGL
* * * * * . *****  **:* * * * * * * * * * * * * * * * * * * * * * :

LCIP63          YEFEMRATGKTVKGRYSFIYVYEDGEWKINHHHSSIMPEGIVTAEPITKEEVRGLFNLWN
tr|B7G7G0      YEFTMGVDGSKVQARYTFVYVFEEDGQWKISHHHSSVMPEAFLGPAAPANANTEVVSKK--
*** * . * . * : * * * * * * * * * * * * * * * * * * * * * * * * * * * :

LCIP63          DALATKDP IQVAKRYSKDGVLPTVSDVVRTDFPGIVDYFTNFLKLEPQGEILGGKVTIG
tr|B7G7G0      -----

LCIP63          TNWAQDAGIYEFTMGATGQKVRGRYTYVYVYEDGEWKIQNHSSVMPESTKQPISSEEV
tr|B7G7G0      -----

LCIP63          RNLFLWNSALATEDPDAVAARYSNNVLLPTVSDVPRNSYALIKDYFVGFLLKRPQGTI
tr|B7G7G0      -----

LCIP63          LESNVTVGHNWASDAGVYEFTMGDNGDKVGRYSFVYVFEEDGQWKISHHHSSVMPEKYL
tr|B7G7G0      -----

LCIP63          AAPKPQIEEEMVIEEPEAVMV
tr|B7G7G0      -----
```

**Figure S2. Similarity of sequence found in *P. tricornutum* and LCIP63 sequence.** Alignment of protein (B7G7G0, UniProt database ID) with LCIP63 was performed using MUSCLE software (<http://www.ebi.ac.uk/Tools/msa/muscle/>). Only two domains are present on this protein as shown by the alignment.

```

>tr|K0SPX5|K0SPX5_THAOC Uncharacterized protein OS=Thalassiosira oceanica
GN=THAOC_16311 PE=4 SV=1
MGRWPRRGAGVDVPRLLARATTLMSRFLASTRIFRSRAAAHSPSPNNSNMKFSTVAVAL
STLSSTQGFSVPAPNRGRSMAQRGVVNVPEPSSTELNLFSGKRLFNPAKVDGDI TEKEVK
ALFELWNQALATGDSRIVASRYTKSPVLLPTVSDVPRTDFASVKDYFDSFLLKQPQGKII
ESHVNIGEGWASDVGIYEFTMGATGDKVKGRYSYNYVKEDGIWKIQHHHSSVMPEEIAMG
KPITDDEVRGLFSLWNNALATLDPKQVANRYAKTGVLLPTVSDTPRADYGAIEDYFVNFL
KLKPQGEILESYVTVGHNWCQDVGIYEFAMGATGKKVKGRYSFIYVYEDGEWKIQHHSS
IMPEGIVTAEPITEKEVRGLFNLWNDALATLDPKKVADRYSKEGVLLPTVSDIPRTDYPG
IEDYFTNFKLKPQGEIESGNIIVGTNWAQDAGIYEFTMGATGAKVKGRYTFVYVFEDGE
WKISQHHSSVMPEASKPKEISEEEVKNLFLQWNSALATEDPDAVAKRYASKAVLLPTVSD
VPRTDYALIKDYFVGFLKPKQGEILESNVTIGHNWCQDAGIYEFTMGATGDKVKGRYSF
VYVYEDGEWKISHHSSVMPEAFLGPAPKPAVDAKETVSA

```

CLUSTAL O(1.2.1) multiple sequence alignment

```

LCIP63          -----MKFTSSLSL
tr|K0SPX5      MGRWPRRGAGVDVPRLLARATTLMSRFLASTRIFRSRAAAHSPSPNNSNMKFSTVAVA-
                ****:  ::

LCIP63          VLFLSAVSTVSSFAPNTVHTTRIGTSATSFNDHIIADTRTSTELGLFGSRWRQARKFNA
tr|K0SPX5      ---LSTLSSTQGFSVPAPNRG-----RMAQRGVVNVPEPSSTELNLFSGK---RLFNS
                **::*:. . . * : .      * : : .      : ****  ****:      * ** :

LCIP63          PAKTIGKSSITEEEVRSFLTLWNSALATGDSRIVASRYTKNPVLLPTVSDQARTDYDSV
tr|K0SPX5      PAKVD---GDITEKEVKALFELWNQALATGDSRIVASRYTKSPVLLPTVSDVPRTDFASV
                ***.      . . ***:***: * ** .*****.*****.*****  ***: **

LCIP63          KDYFDAFLKKPKQGKIIIEGKINIGDSWASDCGIYEFTLGATGEKVKARYSFNYVQENGWV
tr|K0SPX5      KDYFDSFLLKQPQGKIIESHVNIGEGWASDVGIYEFTMGATGDKVKGRYSYNYVKEDGIW
                *****:****:*****. : : ** : . ****  *****:*****:***.***:***: * : * :

LCIP63          KIQHHHSSVMPEEIAMGKAITEDEVRLFLWNNALATLDPKQVAARYAKKGVLLPTVSD
tr|K0SPX5      KIQHHHSSVMPEEIAMGKPITDDEVRGLFSLWNNALATLDPKQVANRYAKTGVLLPTVSD
                *****.*****  ** :*****.*****.*****  ****.*****

LCIP63          KARTDFSSIEDYFVNFLKLPRTILESHVTVGKNWCQDAGIYEFEMRATGKTVKGRYSF
tr|K0SPX5      TPRADYGAIEDYFVNFLKLPQGEILESYVTVGHNWCQDVGIYEFAMGATGKKVKGRYSF
                . * : * : . : *****: * ****.****.****.***** * ****.*****

LCIP63          IYVYEDGEWKINHHSSIMPEGIVTAEPITKEEVRGLFNLWNDALATKDPQVAKRYSKD
tr|K0SPX5      IYVYEDGEWKIQHHHSSIMPEGIVTAEPITEKEVRGLFNLWNDALATLDPKKVADRYSKD
                *****:*****.*****:*****.*****  * : * . ****:

LCIP63          GVLLPTVSDVTRDFPGIVDYFTNFKLEPQGEILGGKVTIGTNWAQDAGIYEFTMGATG
tr|K0SPX5      GVLLPTVSDIPRTDYPGIEDYFTNFKLKPQGEIESGNIIVGTNWAQDAGIYEFTMGATG
                *****  ***:***  *****:*****  . * : : *****.*****

LCIP63          QKVRGRYTYVYVYEDGEWKIQHHSSVMPESTKQPISSEEVNLFQWNSALATEDPDA
tr|K0SPX5      AKVKGRYTFVYVFEDGEWKISQHHSSVMPEASKPKEISEEEVKNLFLQWNSALATEDPDA
                * : ****:***:*****. : *****: * : *****:*****.*****

LCIP63          VAARYSNNVLLPTVSDVPRNSYALIKDYFVGFLKRPQGTILESNVTVGHNWASDAGVY
tr|K0SPX5      VAKRYASKAVLLPTVSDVPRTDYALIKDYFVGFLKPKQGEILESNVTIGHNWCQDAGIY
                * * * : . : *****.*****.*****:****  *****:****. . ***: *

LCIP63          EFTMGDNGDKVKGRYSFVYVFEDGEQWKISHHSSVMPEKYLGAAPKQIEEEMVIEEPE
tr|K0SPX5      EFTMGATGDKVKGRYSFVYVYEDGEWKISHHSSVMPEAFLGPAPKPAVDAKETVSA---
                ***** .*****.*****:***:*****.*****  :**  ****  : : . *

LCIP63          AVMV
tr|K0SPX5      ----

```

**Figure S3. Similarity between sequence found in *T.oceanica* and LCIP63 sequence.** Alignment of protein (K0SPX5, UniProt database ID) with LCIP63 was performed using MUSCLE software (<http://www.ebi.ac.uk/Tools/msa/muscle/>). The four domains are present on this protein as shown by the alignment.

```
>jgi|Psemu1|261071|estExt_Genewise1Plus.C_5280010
MSFDFVVRKKPVVRKVVVEKAPVKAPVKASAPAEAAPFFVDETRTANSVAVDITEKEVRSLSLWNNALA
TGDSRLVASRYATKSGAVLLPTVSDTPRTDYDSIKDYFDGFLKKQPQGEILDGNIRINGWAQDAGIYEF
TMGAEGGAKVKGRYTYTYVMEDGQWKIAHHHSSVMPEGIDIATSITKEEVQGLFHLWNDALATGDSALVA
SRYASKGVLLPTVSDVPRDDFDSIKDYFDAFLKKEPQGKILESFTVIGTNWAQDVGIYEFMTGATGAKVK
ARYSFVYTFEGGQWKIAHHHSSQMPEEVVPGPASITNEEVRLGYLWNDALATLDPAQVASRYSVETAPC
LLPTVSDVPRTDYDSIMAYFVDFCKKEPQGEILESYVTVGHNWAMDDGIYEFTMGATGDKVKARYSFVYT
LEDGVWKIAHHHSSQMPEEIVPKSTVPEFAEANGSSSD*
```

CLUSTAL O(1.2.2) multiple sequence alignment

```
LCIP63          MKFTSSLSLVLFSLAVSTVSSFAPNTVHTTRIGTSATSFNHDIITADTRTSTELGLFGS
Ps|jgi261071   MSF-----DFVVRKK--PVVRK-VVVEKAPVKAPVKAS-----A
                *.*          :  :  . . . . . :.* :.* :
                :
LCIP63          RWRQARKFNAPAKTIGKSSITEEVRSLFTLWNSALATGDSRIVASRYTK--NPVLLPT
Ps|jgi261071   PAEAAFFVDETRTANSVAVDITEKEVRSLSLWNNALATGDSRLVASRYATKSGAVLLPT
                . * * :.* . . :.*:*****:***:*****:*****:.. *****
                :
LCIP63          VSDQARTDYDSVKDYFDAFLKPKQKIIIEGKINIGDSWASDCGIYEFTLGATG-EKVK
Ps|jgi261071   VSDTPRTDYDSIKDYFDGFLKKQPQGEILDGNIRINGWAQDAGIYEFMTGAEGGAKVK
                *** *****:*****.* * :.*:.*:.*:.*:.*:.*:.*:*****:* * *
                :
LCIP63          RYSFNQENGWVKIQHHHSSVMPEEIAMGKAITEDEVRLGYLWNNALATLDPKQVAAR
Ps|jgi261071   RYTYTYVMEDGQWKIAHHHSSVMPEGIDIATSITKEEVQGLFHLWNDALATGDSALVASR
                **:.* *.* * * ***** * :.:*:.*:.*:.* * *:***** * * :.*
                :
LCIP63          YAKKGVLLPTVSDKARTDFSSIEDYFVNFLKLPKRGITILESHVTVGKNWCQDAGIYEFEM
Ps|jgi261071   YASKGVLLPTVSDVPRDDFDSIKDYFDAFLKKEPQGKILESFTVIGTNWAQDVGIYEFMT
                **:***** * ** :.*:*** ** :*:.*:*****:.*:.*:.*:***** *
                :
LCIP63          RATGKTVKGRYSFIYVEDGEWKINHHHSSIMPEGIVTA-EPITKEEVRLGNLWNDALA
Ps|jgi261071   GATGAKVKARYSFVYTFEGGQWKIAHHHSSQMPEEVVPGPASITNEEVRLGYLWNDALA
                *** .** :***:*.:* * :*** ***** * * :* . ** :***** *****
                :
LCIP63          TKDPIQVAKRYSD--GVLLPTVSDVVRTDFPGIVDYFTNFKLEPQGEILGGKVTIGTN
Ps|jgi261071   TLDPAQVASRYSVETAPCLLPTVSDVPRTDYDSIMAYFVDFCKKEPQGEILESYVTVGHN
                * * * * * : ***** ** : .*:.*:.* * ***** . ** : *
                :
LCIP63          WAQDAGIYEFTMGATGQKVRGRYTYVYVEDGEWKIQNHSSVMPESTKQPISSEEVN
Ps|jgi261071   WAMDDGIYEFTMGATGDKVKARYSFVYTFLEDGVWKIAHHHSSQMPEEIVPKSTVPEFAEA
                ** * *****:*.:.*:.*. ** * * .*** ** . * : * ..
                :
LCIP63          LFQLWNSALATEDPDAVAARYSNNVLLPTVSDVPRNSYALIKDYFVGFLLKRPQGTILE
Ps|jgi261071   -----NGSS--SD-----
                *.: .*
                :
LCIP63          SNVTVGHNWASDAGVYEFTMGDNGDKVKGRYSFVYVFEDGQWKISHHSSVMPEKYLGA
Ps|jgi261071   -----
                :
LCIP63          PKPQIEEMVVIIEPEAVMV
Ps|jgi261071   -----
```

**Figure S4. Similarity between sequence found in *Pseudo-nitzschia multiseri* CLN-47 and LCIP63 sequence.** Alignment of protein (261071, JGI database ID) with LCIP63 was performed using MUSCLE software (<http://www.ebi.ac.uk/Tools/msa/muscle/>). Only three domains are present on this protein as shown by the alignment.

**Table S1. List of primers used for qRT PCR.**

| <b>Gene ID name, forward and reverse primers</b> |
|--------------------------------------------------|
| <b><i>Actin (ACT1) : Gene ID 7449411</i></b>     |
| CCTCGATTTCGGGAGATGGTG                            |
| ATCAGGGAGCTCGAAGGACT                             |
| <b><i>LCIP63 :</i></b>                           |
| CCCTCGATCCCAAGCAAGTT                             |
| CTCCAAGATGGTTCTCGGG                              |
| <b><i>THP : Gene ID 7452158</i></b>              |
| ATGCTAACGCTCTCGCTACC                             |
| ACCTCCAAGTCAGCACACAG                             |
| <b><i>CP12 protein : Gene ID 7445028</i></b>     |
| TGTTGATATCCGTGCACCCC                             |
| TATCCCTCAGCCACGATTGC                             |
| <b><i>LRPa : Gene ID 7446790</i></b>             |
| CAAGGAGGCCATTTTCGCAC                             |
| CTGAATGAGGCCGACTCCAC                             |
| <b><i>Sti1 : Gene ID 7448899</i></b>             |
| TAGGTTGAACAGGACGGTGC                             |
| CACCAACCATTGCACTCTGC                             |
